# Supplementary material for: Adaptive Mutations and Replacements of Virulence Traits in the Escherichia coli O104:H4 Outbreak Population
Source: PubMed Central journal article supplement (PMC3651199; doi:10.1371/journal.pone.0063027), 2013-05-10
Supplement: pone.0063027.s001.pdf [file pone.0063027.s001.pdf]

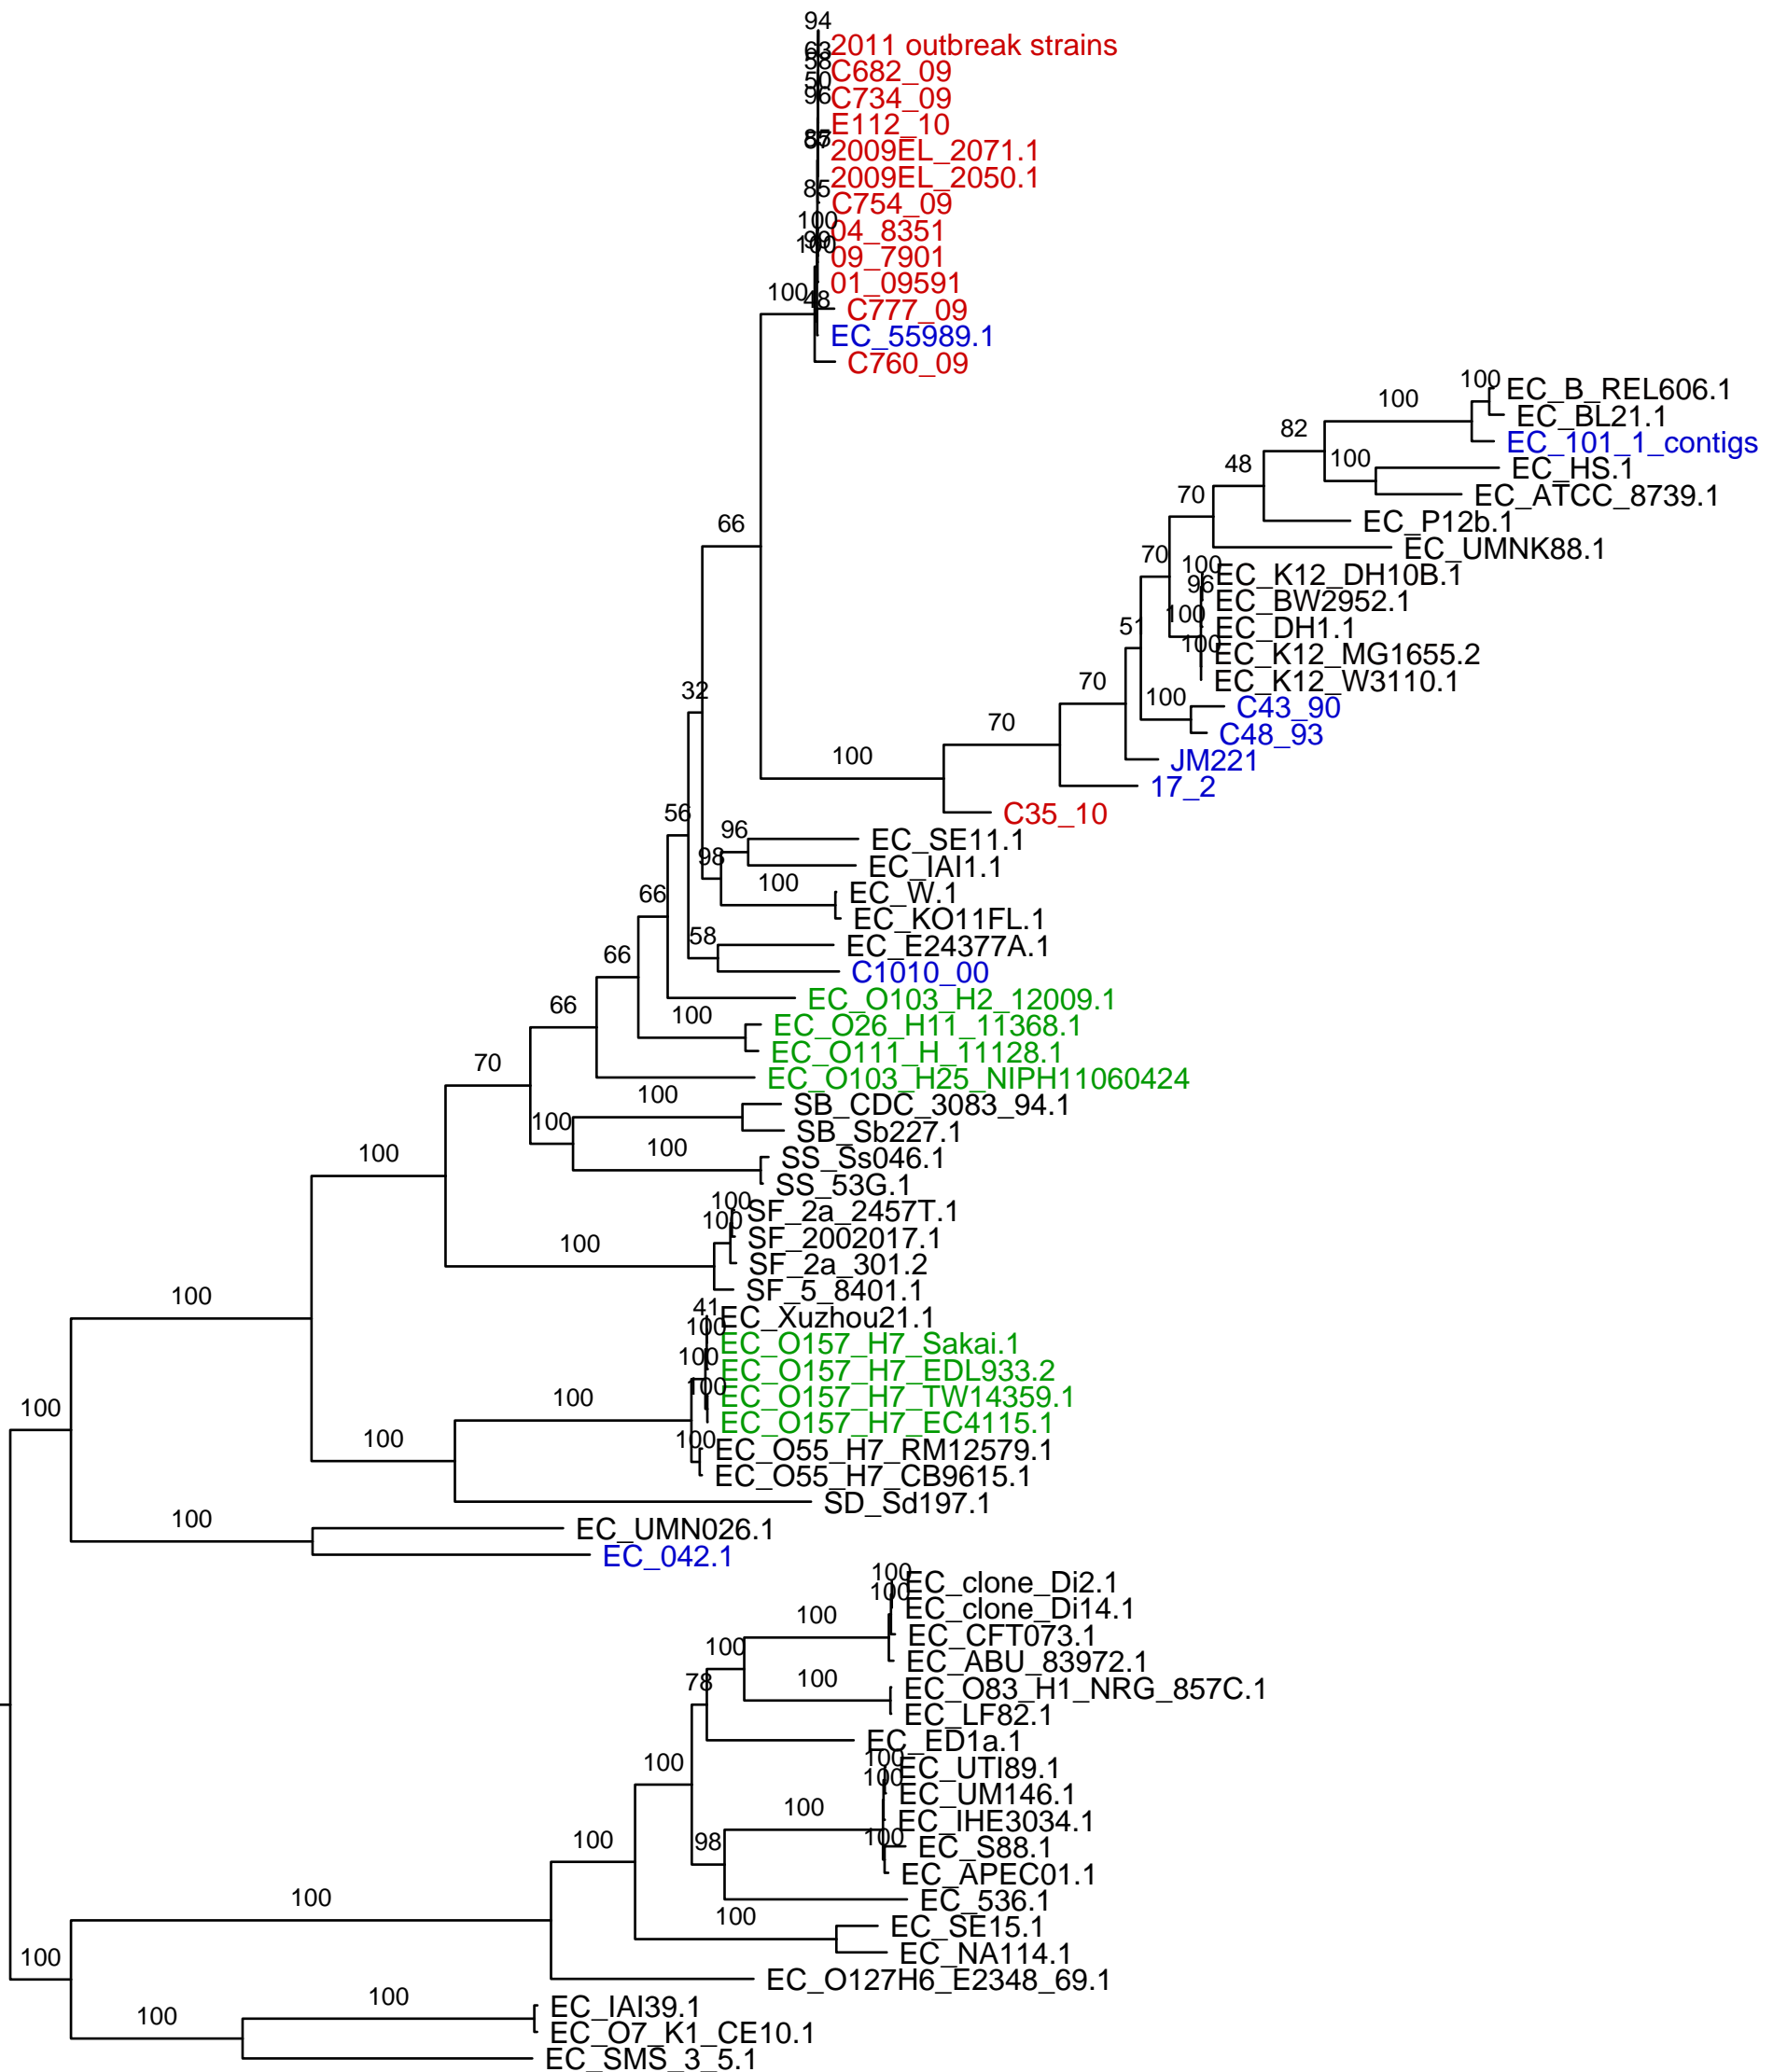

2011 outbreak strains

C682\_09  
 C734\_09  
 E112\_10  
 2009EL\_2071.1  
 2009EL\_2050.1  
 C754\_09  
 04\_8351  
 09\_7901  
 01\_09591  
 C777\_09  
 EC\_55989.1  
 C760\_09

EC\_B\_REL606.1  
 EC\_BL21.1  
 EC\_101\_1\_contigs  
 EC\_HS.1  
 EC\_ATCC\_8739.1  
 EC\_P12b.1  
 EC\_UMNK88.1

EC\_K12\_DH10B.1  
 EC\_BW2952.1  
 EC\_DH1.1  
 EC\_K12\_MG1655.2  
 EC\_K12\_W3110.1  
 C43\_90  
 C48\_93  
 JM221  
 17\_2

C35\_10  
 EC\_SE11.1  
 EC\_IA11.1  
 EC\_W.1  
 EC\_KO11FL.1  
 EC\_E24377A.1  
 C1010\_00

EC\_O103\_H2\_12009.1  
 EC\_O26\_H11\_11368.1  
 EC\_O111\_H\_11128.1  
 EC\_O103\_H25\_NIPH11060424

SB\_CDC\_3083\_94.1  
 SB\_Sb227.1  
 SS\_Ss046.1  
 SS\_53G.1  
 SF\_2a\_2457T.1  
 SF\_2002017.1  
 SF\_2a\_301.2  
 SF\_5\_8401.1

EC\_Xuzhou21.1  
 EC\_O157\_H7\_Sakai.1  
 EC\_O157\_H7\_EDL933.2  
 EC\_O157\_H7\_TW14359.1  
 EC\_O157\_H7\_EC4115.1  
 EC\_O55\_H7\_RM12579.1  
 EC\_O55\_H7\_CB9615.1  
 SD\_Sd197.1

EC\_UMN026.1  
 EC\_042.1

EC\_clone\_Di2.1  
 EC\_clone\_Di14.1  
 EC\_CFT073.1  
 EC\_ABU\_83972.1  
 EC\_O83\_H1\_NRG\_857C.1  
 EC\_LF82.1  
 EC\_ED1a.1  
 EC\_UTI89.1  
 EC\_UM146.1  
 EC\_IHE3034.1  
 EC\_S88.1  
 EC\_APEC01.1  
 EC\_536.1  
 EC\_SE15.1  
 EC\_NA114.1  
 EC\_O127H6\_E2348\_69.1

EC\_IAI39.1  
 EC\_O7\_K1\_CE10.1  
 EC\_SMS\_3\_5.1

0.04
