# Supplementary material for: Adaptive Mutations and Replacements of Virulence Traits in the Escherichia coli O104:H4 Outbreak Population
Source: PubMed Central journal article supplement (PMC3651199; doi:10.1371/journal.pone.0063027), 2013-05-10
Supplement: pone.0063027.s002.pdf [file pone.0063027.s002.pdf]

**Table S1:** Accession numbers for complete genome sequences or contigs included in the whole-genome phylogeny

| <b>Name</b>        | <b>Accession number</b> |
|--------------------|-------------------------|
| EC_042             | NC_017626               |
| EC_536             | NC_008253               |
| EC_55989           | NC_011748               |
| EC_ABU_83972       | NC_017631               |
| EC_APEC01          | NC_008563               |
| EC_ATCC_8739       | NC_010468               |
| EC_BL21            | NC_012947               |
| EC_B_REL606        | NC_012967               |
| EC_BW2952          | NC_012759               |
| EC_CFT073          | NC_004431               |
| EC_E24377A         | NC_009801               |
| EC_clone_Di14      | NC_017652               |
| EC_clone_Di2       | NC_017651               |
| EC_DH1             | NC_017625               |
| EC_ED1a            | NC_011745               |
| EC_HS              | NC_009800               |
| EC_IAI1            | NC_011741               |
| EC_IAI39           | NC_011750               |
| EC_IHE3034         | NC_017628               |
| EC_K12_DH10B       | NC_010473               |
| EC_K12_MG1655      | NC_000913               |
| EC_K12_W3110       | NC_007779               |
| EC_KO11FL          | NC_016902               |
| EC_LF82            | NC_011993               |
| EC_NA114           | NC_017644               |
| EC_O103_H2_12009   | NC_013353               |
| EC_O111_H_11128    | NC_013364               |
| EC_O127H6_E2348_69 | NC_011601               |
| EC_O157_H7_EC4115  | NC_011353               |
| EC_O157_H7_EDL933  | NC_002655               |
| EC_O157_H7_Sakai   | NC_002695               |
| EC_O157_H7_TW14359 | NC_013008               |
| EC_O26_H11_11368   | NC_013361               |
| EC_O55_H7_CB9615   | NC_013941               |
| EC_O55_H7_RM12579  | NC_017656               |
| EC_O7_K1_CE10      | NC_017646               |
| EC_O83_H1_NRG_857C | NC_017634               |
| EC_P12b            | NC_017663               |
| EC_S88             | NC_011742               |
| EC_SE11            | NC_011415               |
| EC_SE15            | NC_013654               |
| EC_SMS_3_5         | NC_010498               |
| EC_UM146           | NC_017632               |
| EC_UMN026          | NC_011751               |
| EC_UMNK88          | NC_017641               |
| EC_UTI89           | NC_007946               |

| <b>Name</b>              | <b>Accession number</b> |
|--------------------------|-------------------------|
| EC_W                     | NC_017635               |
| EC_Xuzhou21              | NC_017906               |
| SB_CDC_3083_94           | NC_010658               |
| SB_Sb227                 | NC_007613               |
| SD_Sd197                 | NC_007606               |
| SF_2002017               | NC_017328               |
| SF_2a_2457T              | NC_004741               |
| SF_2a_301                | NC_004337               |
| SF_5_8401                | NC_008258               |
| SS_53G                   | NC_016822               |
| SS_Ss046                 | NC_007384               |
| EC_101_1_contigs         | NZ_AAMK020000*          |
| 04_8351                  | AFRL01                  |
| 09_7901                  | AFRK01                  |
| EC_O103_H25_NIPH11060424 | AGSG01                  |
| 2011C_3493               | NC_018658               |
| 2009EL_2050              | NC_018650               |
| 2009EL_2071              | NC_018661               |
