# Supplementary material for: Adaptive Mutations and Replacements of Virulence Traits in the Escherichia coli O104:H4 Outbreak Population
Source: PubMed Central journal article supplement (PMC3651199; doi:10.1371/journal.pone.0063027), 2013-05-10
Supplement: pone.0063027.s003.pdf [file pone.0063027.s003.pdf]

**Table S2:** Accession numbers for sequences included in the pathogenicity islands and phage phylogenies

| <b>Name</b>                  | <b>Accession number</b> |
|------------------------------|-------------------------|
| CS_BAA_894                   | CP000783                |
| KP_pK2044                    | AP006726                |
| KP_pK29                      | EF382672                |
| E_cloacae_pEC_IMPQ           | EU855788                |
| EC_pAPEC_01_R                | DQ517526                |
| EC_pNT3B                     | AJ888883                |
| E_cloacae_pEC_IMP            | EU855787                |
| SM_R478                      | BX664015                |
| EC_UMNK88                    | CP002729                |
| KP_str342_pKP187             | CP000965                |
| E_cloacae_13047_pECL_A       | CP001919                |
| KP_pLVPK                     | AY378100                |
| EC_ABU_83972                 | CP001671                |
| EC_mic_op_str_CA46           | AJ515251                |
| EC_042                       | FN554766                |
| EC_mic_op_str_CA58           | AJ515252                |
| EC_mic_op_H47                | AJ009631                |
| EC_DH1                       | CP001637                |
| EC_O83_H1_str_857C_p083_CORR | CP001856                |
| KP_pKP048                    | FJ628167                |
| EC_O111_H_11128_pO111_1      | AP010961                |
| SE_strCT18_pHCM1             | AL513383                |
| ST_pU302L                    | AY333434                |
| EC_O26_H_06877_pO26_CRL      | GQ259888                |
| EC_APEC03_pAPEC_0103_ColBM   | CP001232                |
| SE_ParatA_IncH1              | AM412236                |
| EC_SE15                      | AP009378                |
| SF_2a_SRL_path_island        | AF326777                |
| Entbact_phage_VT2_Sakai      | AP000363                |
| Entbact_phage_VT2phi_272     | HQ424691                |
| NC_009801                    | CP000800                |
| NC_013353                    | AP010958                |
| NC_013008                    | CP001368                |
| NC_002695                    | BA000007                |
| NC_013364                    | AP010960                |
| NC_011745                    | CU928162                |
| NC_013361                    | AP010953                |
| NC_011748                    | CU928145                |
| NC_008253                    | CP000247                |
| NC_002655                    | AE005174                |
| NC_011353                    | CP001164                |
| NC_004741                    | AE014073                |
| NC_000913                    | U00096                  |
| NC_010473                    | CP000948                |
| NC_012759                    | CP001396                |
| EC_536                       | NC_008253               |
| EC_55989                     | NC_011748               |

---

| <b>Name</b>             | <b>Accession number</b> |
|-------------------------|-------------------------|
| EC_APEC01               | NC_008563               |
| EC_ATCC_8739            | NC_010468               |
| EC_BL21                 | NC_012947               |
| EC_B_REL606             | NC_012967               |
| EC_BW2952               | NC_012759               |
| EC_CFT073               | NC_004431               |
| EC_E24377A              | NC_009801               |
| EC_ED1a                 | NC_011745               |
| EC_HS                   | NC_009800               |
| EC_IAI1                 | NC_011741               |
| EC_IAI39                | NC_011750               |
| EC_K12_DH10B            | NC_010473               |
| EC_K12_MG1655           | NC_000913               |
| EC_K12_W3110            | AC_000091               |
| EC_O103_H2_12009        | NC_013353               |
| EC_O111_H_11128         | NC_013364               |
| EC_O127H6_E2348_69      | NC_011601               |
| EC_O157_H7_EC4115       | NC_011353               |
| EC_O157_H7_EDL933       | NC_002655               |
| EC_O157_H7_Sakai        | NC_002695               |
| EC_O157_H7_TW14359      | NC_013008               |
| EC_O26_H11_11368        | NC_013361               |
| EC_O55_H7_CB9615        | NC_013941               |
| EC_S88                  | NC_011742               |
| EC_SE11                 | NC_011415               |
| EC_SMS_3_5              | NC_010498               |
| EC_UMN026               | NC_011751               |
| EC_UTI89                | NC_007946               |
| SB_CDC_3083_94          | NC_010658               |
| SB_Sb227                | NC_007613               |
| SD_Sd197                | NC_007606               |
| SF_2a_2457T             | NC_004741               |
| SF_2a_301               | NC_004337               |
| SF_5_8401               | NC_008258               |
| SS_Ss046                | NC_007384               |
| EC_K12_W3110            | AP009048                |
| Stx1_conv_phage         | AP005153                |
| Stx2_conv_phage_I       | AP004402                |
| Stx2_conv_phage_II      | AP005154                |
| Entbact_phage_Min27     | EU311208                |
| SD_Sd197                | CP000034                |
| EC_O26_H11_11368        | AP010953                |
| phage_TL2011c           | JQ011318                |
| Stx2_conv_phage_86      | AB255436                |
| 2011C3493               | NC_018658               |
| 2009EL2050              | NC_018650               |
| 2009EL2071              | NC_018661               |
| Stx2_convph_vB_EcoP_24B | HM208303                |

---
